# Supplementary material for: Centromere-Independent Accumulation of Cohesin at Ectopic Heterochromatin Sites Induces Chromosome Stretching during Anaphase
Source: PubMed Central journal article supplement (PMC4188515; doi:10.1371/journal.pbio.1001962), 2014-10-07
Supplement: pbio.1001962.s011.pdf [file pbio.1001962.s011.pdf]

**Table S1** - Drosophila stocks used in this study

| <b>Genotype</b>                                                                                                                                               | <b>Reference</b>         |
|---------------------------------------------------------------------------------------------------------------------------------------------------------------|--------------------------|
| w;;tubpr-Rad21(wt)-EGFP 2, Rad21 <sup>ex15</sup> (rec 2.21)                                                                                                   | This study               |
| w;H2Av-mRFP;tubpr-Rad21(wt)-EGFP 2, Rad21 <sup>ex15</sup> (rec 2.21)                                                                                          | This study               |
| w; C(2)En, bw <sup>1</sup> ,sp <sup>1</sup> ; tubpr-Rad21(wt)-EGFP 2, Rad21 <sup>ex15</sup> /(TM6,C)                                                          | This study               |
| w;P[w+, gCRC]II.1, P[w+, gCRC]II.2/CyO;                                                                                                                       | Schuh et al, 2007        |
| w;HisH2AvD-mRFP1 II.2;                                                                                                                                        | Schuh et al, 2007        |
| w;P[w+, gCRC]II.1, P[w+, gCRC]II.2/CyO; tubpr-Rad21(wt)-EGFP 2, Rad21 <sup>ex15</sup> (rec 2.21)                                                              | This study               |
| RNAi Nipped-B                                                                                                                                                 | TRiP #32406              |
| RNAi SA                                                                                                                                                       | TRiP #33395              |
| Elav-Gal4                                                                                                                                                     | Lin and Goodman, 1994    |
| wap  <sup>C204</sup> /FM7;;                                                                                                                                   | Verni et al, 2000        |
| wap  <sup>C204</sup> /FM7i,Actin-GFP;;Rad21 <sup>550-3TEV</sup> -EGFP, Rad21 <sup>ex15</sup> , pPolyubiquitin-H2A-mRFP1/TM3                                   | Eichinger et al, 2013    |
| yw; chip-NippedB-GFP (II);                                                                                                                                    | Gause et al, 2010        |
| w;C(2)EN, bw <sup>1</sup> ,sp <sup>1</sup> ;tubpr-Rad21(wt)-EGFP 2, Rad21 <sup>ex15</sup> (rec 3.1.3)                                                         | This study               |
| w;C(2)EN, bw <sup>1</sup> ,sp <sup>1</sup> ;HisH2AvD-mRFP1 III.1                                                                                              | Martins et al, 2013      |
| w <sup>1118</sup> ; P[GFP-HP1]3/TM6B, Tb <sup>1</sup>                                                                                                         | Bloomington #30561       |
| w;C(2)EN, bw <sup>1</sup> ,sp <sup>1</sup> ;P[GFP-HP1]3                                                                                                       | This study               |
| T(2,3)It <sup>X13</sup>                                                                                                                                       | Wakimoto and Hearn, 1990 |
| In(3LR)264, mv1/TM6B, Tb1                                                                                                                                     | Bloomington #1222        |
| In(1)pdf, w <sup>a</sup> pdf <sup>1</sup>                                                                                                                     | Bloomington #980         |
| In(3LR)pcv, pcv <sup>1</sup>                                                                                                                                  | Bloomington #6176        |
| In(3R)Scr <sup>Wrv5</sup> , red <sup>1</sup> Scr <sup>Wrv5</sup> e <sup>1</sup> /TM3, Sb <sup>1</sup>                                                         | Bloomington #2010        |
| In(3R)Antp <sup>rv1</sup> , osa <sup>Arv1</sup> /TM3, Sb <sup>1</sup>                                                                                         | Bloomington #1805        |
| In(3L)gv <sup>U</sup> , ru <sup>1</sup> h <sup>1</sup> gv <sup>U</sup> eyg <sup>U</sup> gl <sup>2</sup> e <sup>4</sup> /TM3, Sb <sup>1</sup> Ser <sup>1</sup> | Bloomington #1325        |
| In(2R)XE-2776, PTP-ER <sup>XE-2776</sup> /CyO, P[sevRas1.V12]FK1                                                                                              | Bloomington #5765        |
